# Supplementary material
Source: PubMed Central journal article supplement (PMC4816683)
Supplement: mmc1.pdf [file mmc1.pdf]

**Biophysical Journal, Volume 110**

**Supplemental Information**

**PIP Water Transport and Its pH Dependence Are Regulated by Tetramer  
Stoichiometry**

**Cintia Jozefkowicz, Lorena Sigaut, Florencia Scochera, Gabriela Soto, Nicolás Ayub, Lía Isabel Pietrasanta, Gabriela Amodeo, F. Luis González Flecha, and Karina Alleva**

## Supporting Material

### PIP Water Transport and its pH Dependence are regulated by Tetramer Stoichiometry

Cintia Jozefkowicz,<sup>1</sup> Lorena Sigaut,<sup>2,3</sup> Florencia Scochera,<sup>1,4</sup> Gabriela Soto,<sup>5</sup> Nicolás Ayub,<sup>5</sup> Lía Isabel Pietrasanta,<sup>2,3,6</sup> Gabriela Amodeo,<sup>7</sup> F. Luis González Flecha,<sup>1</sup> Karina Alleva<sup>1,4,\*</sup>

<sup>1</sup> Instituto de Química y Fisicoquímica Biológica “Alejandro C. Paladini” (IQUIFIB, UBA-CONICET), Buenos Aires, Argentina; <sup>2</sup> Departamento de Física, Facultad de Ciencias Exactas y Naturales, Universidad de Buenos Aires; <sup>3</sup> Instituto de Física de Buenos Aires (IFIBA), CONICET, Ciudad Universitaria, Buenos Aires, Argentina; <sup>4</sup> Departamento de Fisicomatemática, Facultad de Farmacia y Bioquímica, UBA, Buenos Aires, Argentina; <sup>5</sup> Instituto de Genética “Ewald A. Favret”, CICVyA, Instituto Nacional de Tecnología Agropecuaria (INTA), Castelar, Argentina; <sup>6</sup> Centro de Microscopías Avanzadas, Facultad de Ciencias Exactas y Naturales-UBA, CONICET, <sup>7</sup> Departamento de Biodiversidad y Biología experimental, Instituto de Biodiversidad y Biología Experimental y Aplicada, Facultad de Ciencias Exactas y Naturales, UBA-CONICET, Buenos Aires, Argentina.

\*Correspondence: [kalleva@ffyb.uba.ar](mailto:kalleva@ffyb.uba.ar)

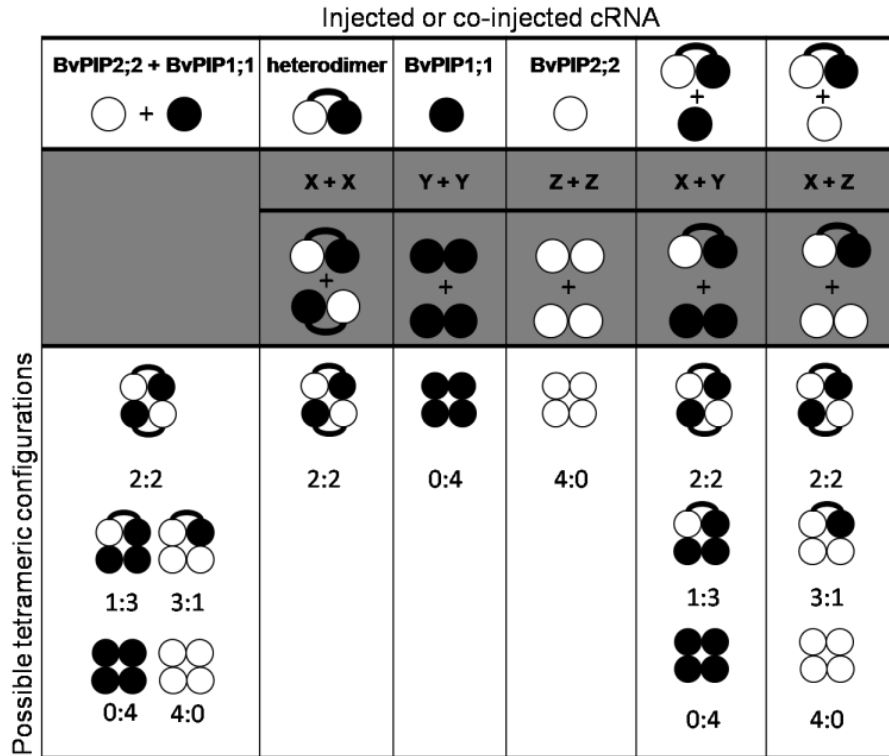

**Figure S1. Schematic representation of possible tetramer configurations generated by the injection of heterodimer, BvPIP1;1, BvPIP2;2 cRNA or by the co-injection of combinations of cRNA.** Upon coexpression of BvPIP1;1 plus BvPIP2;2 monomers several tetrameric configurations are possible; but when heterodimer or BvPIP2;2 or BvPIP1;1 cRNA are injected alone in oocytes, single tetrameric species are expressed. By co-injecting the heterodimer with either BvPIP1;1 or BvPIP2;2 monomers, only three different tetrameric configurations are plausible. This strategy is based on the assumption that the injection of single cRNA species alone (PIP1, PIP2 or dimeric constructs), or co-injected, will result in the assembly of tetramers with different configurations. Our mathematical model consider that: i- PIP1 and PIP2 monomers associate as dimers in a first step and that tetramerization occurs by dimerization of dimers (shown in gray background); ii- the dimerization step is given randomly allowing different stoichiometries to be ensemble. Then, in our model, we considered the following types of dimers: X=PIP2-PIP1; Y=PIP1-PIP1, Z=PIP2-PIP2.

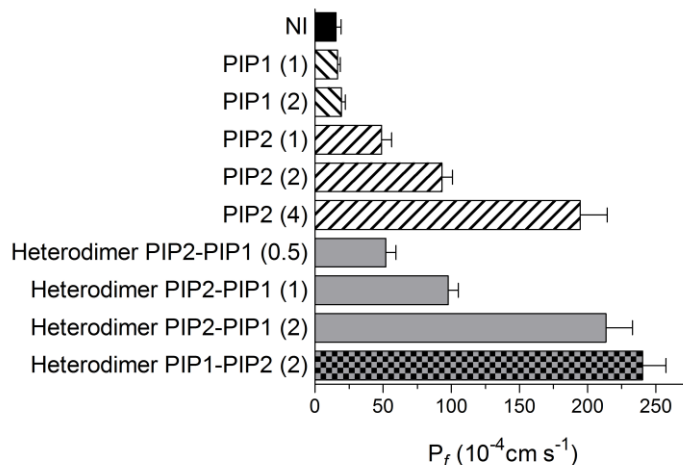

**Figure S2. Functionality assay of single PIP1 (BvPIP1;1), PIP2 (BvPIP2;2), heterodimer PIP2-PIP1 (BvPIP2;2-BvPIP1;1) and heterodimer PIP1-PIP2 (BvPIP1;1-BvPIP2;2) injected at different cRNA masses.** Different amounts of cRNA of BvPIP1;1, BvPIP2;2, or different tandem constructs made of covalently link BvPIP1;1 and BvPIP2;2 (BvPIP2;2-BvPIP1;1 and BvPIP1;1-BvPIP2;2 heterodimers) were injected in *Xenopus* oocytes and the osmotic water permeability coefficient ( $P_f$ ) was determined after three days. We found that the osmotic water permeability coefficient ( $P_f$ ) for oocytes expressing heterodimers or single BvPIPs were proportional to the mass of cRNA injected. Both heterodimers (BvPIP1;1-BvPIP2;2 and BvPIP2;2-BvPIP1;1) were able to transport water, independently of which monomer was linked by the C-terminal end to the other monomer in the fusion polypeptide. The relative quantity of cRNA injected in each oocyte is shown in parentheses, being (0.5) equal to 1.25 ng cRNA/oocyte, (1) equal to 2.5 ng cRNA/oocyte, (2) equal to 5 ng cRNA/oocyte and (4) equal to 10 ng cRNA/oocyte. NI: non-injected oocytes. Data are expressed as mean values (mean  $P_f \pm$  SEM,  $n=5$ ).

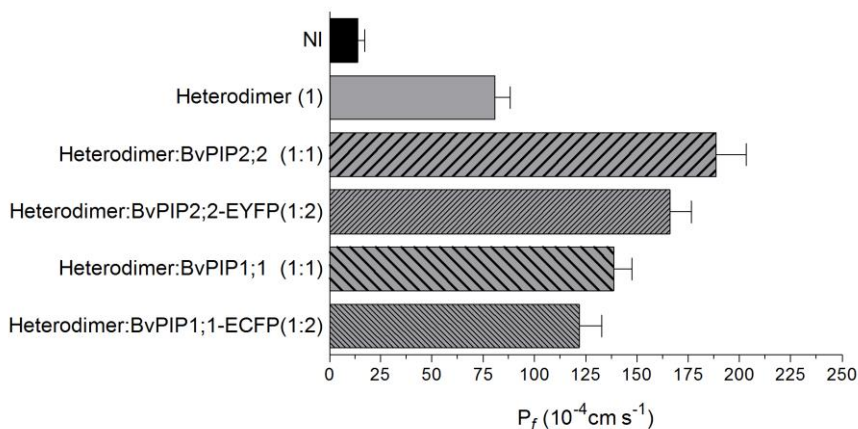

**Figure S3.  $P_f$  of oocyte membranes expressing fluorescent tagged-BvPIP.** The coexpression of both BvPIP2;2-EYFP and BvPIP1;1-ECFP + heterodimer showed water transport activity similar to that of their corresponding coexpressions of the heterodimer with wild-type BvPIP2;2

and BvPIP1;1 monomers, indicating that the fluorescent tag does not modify protein activity or functional interaction. The relative quantity of cRNA injected in each oocyte is shown in parentheses. NI, non-injected oocytes used as negative controls. Values are representative of four independent experiments using different oocyte batches. For each condition, mean values are shown as mean  $P_f \pm$  SEM,  $n = 7-10$ .

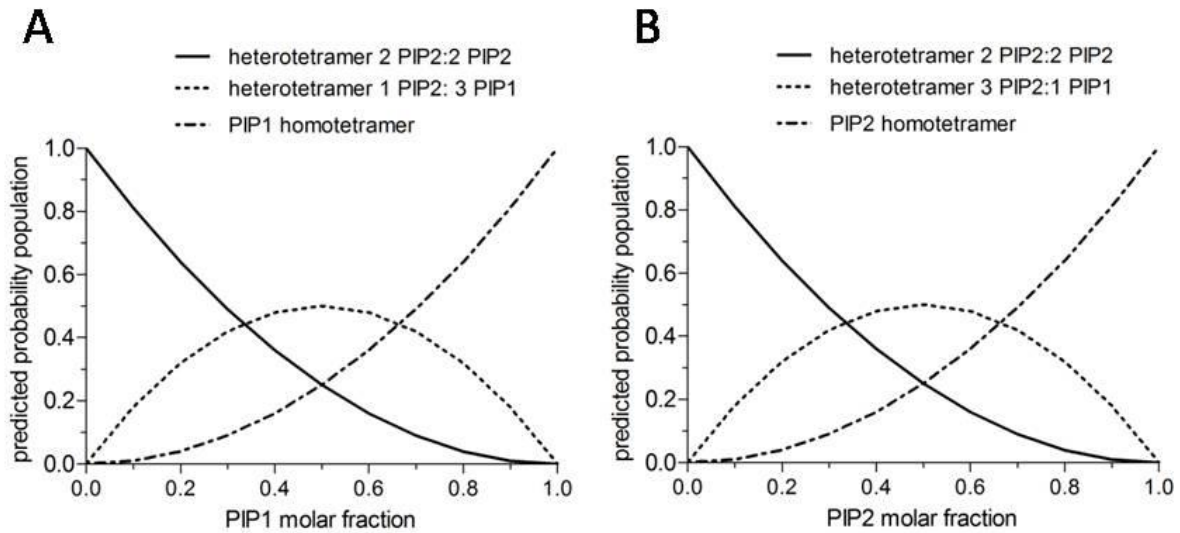

**Figure S4. Predicted fraction of each tetrameric species as function of the molar fraction of PIP1 (A) or PIP2 (B) subunits.** Curves were calculated using Eq. 2.
